# Supplementary material for: Charge Transport in LDPE Nanocomposites Part I—Experimental Approach
Source: PubMed Central journal article supplement (PMC6432595; doi:10.3390/polym8030087), 2016-03-16
Supplement: polymers-08-00087-s001.pdf [file polymers-08-00087-s001.pdf]

# Supplementary Materials: Charge Transport in LDPE Nanocomposites Part I—Experimental Approach

Anh T. Hoang, Love Pallon, Dongming Liu, Yuriy V. Serdyuk, Stanislaw M. Gubanski and Ulf W. Gedde

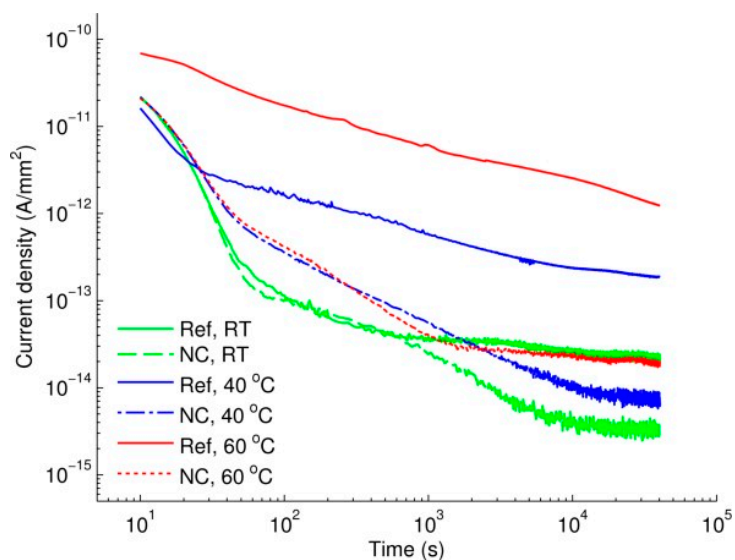

**Figure S1.** Densities of charging currents as functions of time measured at room temperature (RT) ~20–22 °C, 40 °C, and 60 °C for the reference LDPE (Ref) and LDPE/MgO 3 wt % nanocomposite (NC).

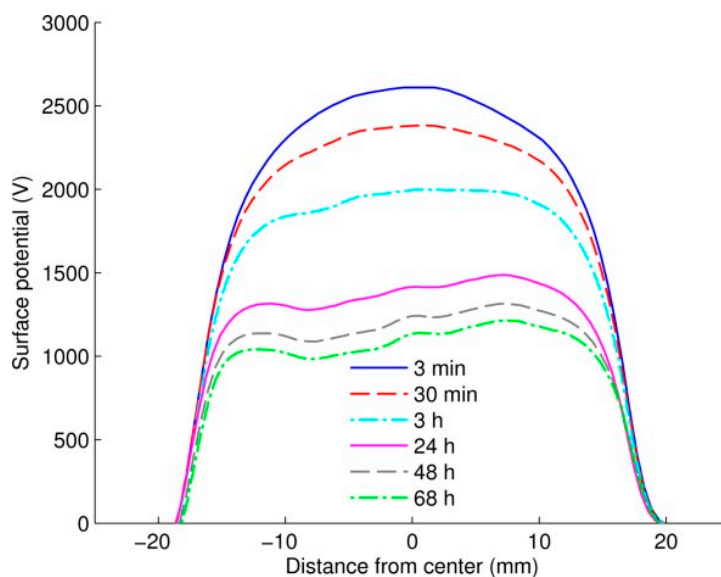

**Figure S2.** Distribution of surface potential during potential decay measurement on LDPE/MgO 3wt % nanocomposite at 60 °C.

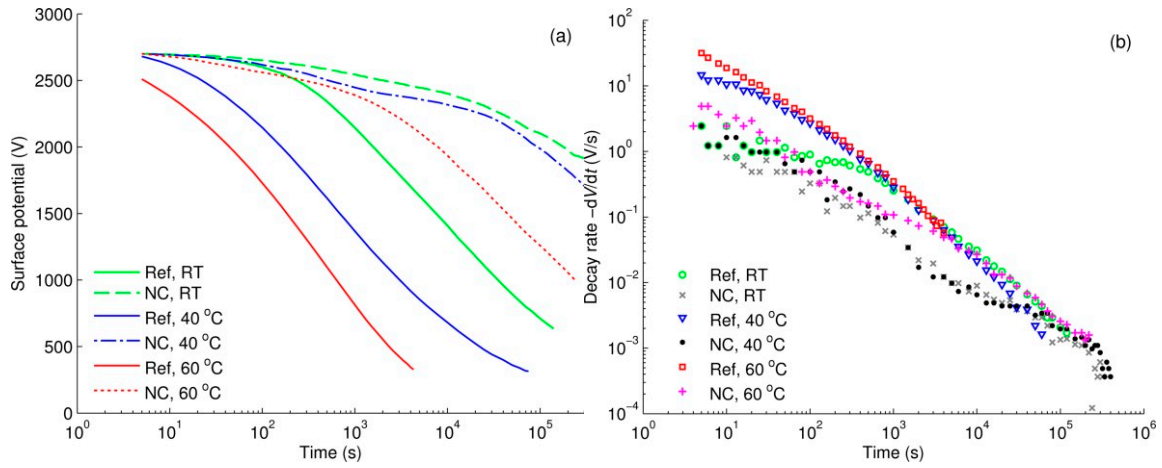

**Figure S3.** Measured surface potentials (a); and calculated decay rates (b) for reference LDPE (Ref) and LDPE/MgO 3 wt % nanocomposite (NC) at different temperatures.

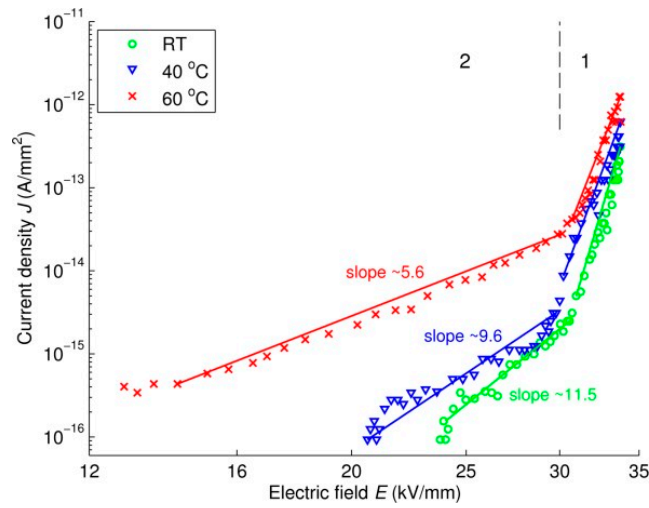

**Figure S4.** Log-log plot of  $J$  vs  $E$  for LDPE/MgO 3 wt % nanocomposite at various temperatures.

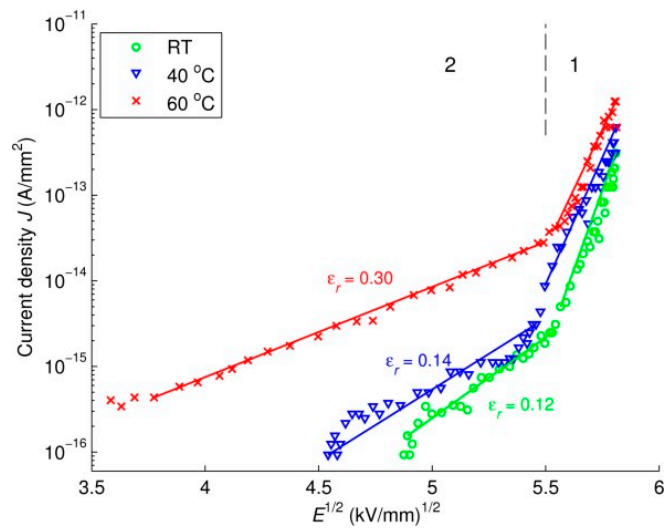

**Figure S5.** Schottky plot for LDPE/MgO 3 wt % nanocomposite at various temperatures.

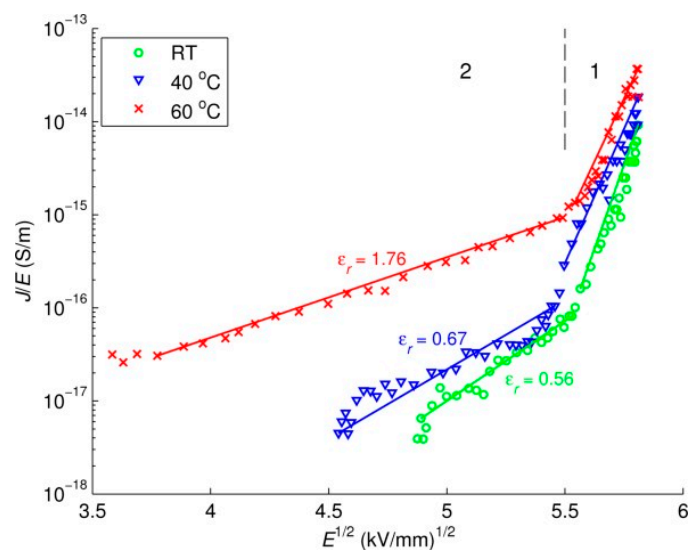

Figure S6. Poole-Frenkel plot for LDPE/MgO 3 wt % nanocomposite at various temperatures.

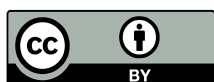

© 2016 by the authors; licensee MDPI, Basel, Switzerland. This article is an open access article distributed under the terms and conditions of the Creative Commons by Attribution (CC-BY) license (<http://creativecommons.org/licenses/by/4.0/>).
